# Supplementary material for: COVID-19 and MIS-C treatment in children—results from an international survey
Source: PubMed Central journal article supplement (PMC10640428; doi:10.1007/s00431-023-05179-7), 2023-09-06
Supplement: 431_2023_5179_MOESM1_ESM.pdf [file 431_2023_5179_MOESM1_ESM.pdf]

## *Supplementary Materials*

The online questionnaire is available as a PDF document, attached to the *Supplementary Materials*.

### *Countries of origin of respondents*

Among all respondents, 20.5% (15/73) were from Italy, 9.5% (7/73) from the UK, 8.2% (6/73) from Thailand and Spain, 6.8% (5/73) from South Africa and Tanzania, 4.1% (3/73) from Canada and Germany, 2.7% (2/73) from Ethiopia, Pakistan and the Netherlands, 1.3% (1/73) from Bulgaria, Brazil, Poland, Australia, USA, Colombia, Argentina, Lesotho, Peru, Finland, Switzerland, Zambia, France, Uganda, Ukraine, Portugal, Rwanda each.

### *Global availability by medicine*

Remdesivir: Unavailable in some centers in Tanzania, South Africa, Colombia and Lesotho.

Nirmatrelvir + ritonavir: Unavailable in Colombia, Poland, Ukraine, South Africa, Bulgaria, Lesotho, Brazil and Tanzania.

Molnupinavir: Unavailable in Colombia, South-Africa, Bulgaria, Pakistan, Lesotho, Brazil, Tanzania.

Casirivimab-imdevimab: Unavailable in casirivimab-imdevimab was unavailable in centers in Colombia, South Africa, Thailand, Lesotho, Brazil, Tanzania, USA (Texas).

Sotrovimab: Unavailable in Colombia, South Africa, Thailand, Bulgaria, Pakistan, Lesotho, Brazil, UK, Tanzania, Uganda, USA (Texas).

Tixagevimab-cilgavimab: Unavailable in Colombia, South-Africa, Thailand, Bulgaria, Pakistan, UK, Lesotho, Brazil, Uganda, USA (Texas).

### *COVID-19 treatment – dosing details of other molecules*

The youngest patient receiving nirmatrelvir + ritonavir was one year old; the most frequently prescribed dose was 200 mg (30 kg) or 400 mg (adult dose) twice daily (5/70 answers). The youngest reported patient to receive molnupiravir was ten, at a dose of 800 mg twice daily (adult dose, 5/70 answers).

For monoclonals, the administration of casirivimab/imdevimab was reported for children as young as six months of age at variable dosages (8/70 answers).

Children as young as two years of age received tixagevimab/cilgavimab at a dose of 150 mg under 40 kg and 300 mg over 40 kg.

### *COVID-19 treatment - Reasons behind medicine choice*

The choice of monoclonal antibodies was based on the SARS-CoV-2 circulating variant, according to 16/39 answers (41%), and depended on the availability of the medicine at the hospital, according to 11/39 (38.2%) answers. Other reasons guiding the medicine of choice, mentioned by at least one respondent, included the patient's age, immunosuppression state, the prolonged activity of the drug, risk stratification according to disease severity and national policy, clinical trial access and risk/benefit ratio for the individual patient, including serostatus and variant.

### *Free-text comments*

Seven respondents from the UK, South Africa and Germany mentioned using tocilizumab in the final free-text comments. Tocilizumab use was described for children and young adolescents (excluding infants aged below one year) COVID-19 and MIS-C alike, mainly in the context of the RECOVERY trial, often as a rescue treatment for COVID-19 cases. Respondents indicated that tocilizumab was administered intravenously (IV) at a dose of 12 mg/kg (single dose) and 8 mg/kg (maximum 800 mg) for people aged under 12 years (<30 kg) and above 12 years (>30 kg),

respectively. Respondents indicated that it was challenging to state the benefits of drug administration; one responder reported rapid improvement in an 8-year-old patient.

# Covid-19 and MIS-C management and treatment survey

\* Indica una domanda obbligatoria

---

1. Email \*

---

2. Country \*

---

3. Center name

---

## Management of Covid-19 in pediatric patients - general management

4. Did you use steroids for the clinical management of pediatric Covid-19 patients? \*

*Contrassegna solo un ovale.*

yes

no

not available

No, available but not approved for children with COVID-19

No, available but not approved for COVID-19

Altro: \_\_\_\_\_

5. How many patients were treated with steroids for Covid-19?

---

6. **How old was the youngest patient you prescribed steroids to?**

---

7. **Please, specify drug name and dose (mg/kg/day)**

---

8. **Did you observe any clinical benefit as a result?**

---

9. **Did you report any side effect in relation to the drug being administered?**

---

### **Management of Covid-19 in pediatric patients - Antivirals**

10. **Did you use Remdesivir for the clinical management of pediatric Covid-19 patients? \***

*Contrassegna solo un ovale.*

yes

no

not available

no, available but not approved for children with COVID-19

no, available but not approved for COVID-19

Altro: \_\_\_\_\_

11. **How many patients were treated with Remdesivir for Covid-19?**

---

12. **How old was the younger patient you prescribed Remdesivir to?**

---

13. **Please, specify dose (mg/kg/day)**

---

14. **Did you observe any clinical benefit as a result?**

---

15. **Did you report any side effect in relation to the drug being administered?**

---

16. **Did you use Paxlovid (PF-07321332/ritonavir) for the clinical management of pediatric Covid-19 patients?**

\*

*Contrassegna solo un ovale.*

yes

no

not available

no, available but not approved for children with COVID-19

no, available but not approved for COVID-19

Altro: \_\_\_\_\_

17. **How many patients were treated with Paxlovid (PF-07321332/ritonavir) for Covid-19 ?**

---

18. **How old was the youngest patient you prescribed Paxlovid (PF-07321332/ritonavir) to?**

---

19. **Please, specify dose (mg/kg/day)**

---

20. **Did you observe any clinical benefit as a result?**

---

21. **Did you report any side effect in relation to the drug being administered?**

---

22. **Did you use Lagevrio (molnupiravir) for the clinical management of pediatric Covid-19 patients?** \*

*Contrassegna solo un ovale.*

yes

no

not available

no, available but not approved for children with COVID-19

no, available but not approved for COVID-19

Altro: \_\_\_\_\_

23. **How many patients were treated with Lagevrio (molnupiravir) for Covid-19?**

---

24. **How old was the youngest patient you prescribed Lagevrio (molnupiravir) to?**

---

25. **Please, specify dose (mg/kg/day)**

---

26. **Did you observe any clinical benefit as a result?**

---

27. **Did you report any side effect in relation to the drug being administered?**

---

### **Management of Covid-19 in pediatric patients - Monoclonal antibodies**

28. **Did you use Ronapreve (casirivimab-imdevimab) for the clinical management of pediatric Covid-19 patients?** \*

*Contrassegna solo un ovale.*

- yes
- no
- not available
- no, available but not approved for children with COVID-19
- no, available but not approved for COVID-19
- Altro: \_\_\_\_\_

29. **How many patients were treated with Ronapreve (casirivimab-imdevimab) for Covid-19?**

---

30. **How old was the youngest patient you prescribed Ronapreve (casirivimab-imdevimab) to?**

---



31. **Please, specify dose (mg/kg/day)**

---

32. **Did you observe any clinical benefit as a result?**

---

33. **Did you report any side effect in relation to the drug being administered?**

---

34. **Did you use Regkirona (regdanvimab) for the clinical management of pediatric Covid-19 patients?** \*

*Contrassegna solo un ovale.*

yes

no

not available

no, available but not approved for children with COVID-19

no, available but not approved for COVID-19

Altro: \_\_\_\_\_

35. **How many patients were treated with Regkirona (regdanvimab) for Covid-19?**

---

36. **How old was the youngest patient you prescribed Regkirona (regdanvimab) to?**

---

37. **Please, specify dose (mg/kg/day)**

---

38. **Did you observe any clinical benefit as a result?**

---

39. **Did you report any side effect in relation to the drug being administered?**

---

40. **Did you use Xevudy (sotrovimab) for the clinical management of pediatric Covid-19 patients?** \*

*Contrassegna solo un ovale.*

yes

no

not available

no, available but not approved for children with COVID-19

no, available but not approved for COVID-19

Altro: \_\_\_\_\_

41. **How many patients were treated with Xevudy (sotrovimab) for Covid-19??**

---

42. **How old was the youngest patient you prescribed Xevudy (sotrovimab) to?**

---

43. **Please, specify dose (mg/kg/day)**

---

44. **Did you observe any clinical benefit as a result?**

---

45. **Did you report any side effect in relation to the drug being administered?**

---

46. **Did you use Evusheld (tixagevimab-cilgavimab) for the clinical management of pediatric Covid-19 patients?**

\*

*Contrassegna solo un ovale.*

- yes
- no
- not available
- no, available but not approved for children with COVID-19
- no, available but not approved for COVID-19
- Altro: \_\_\_\_\_

47. **How many patients were treated with Evusheld (tixagevimab-cilgavimab) for Covid19?**

---

48. **How old was the youngest patient you prescribed Evusheld (tixagevimab-cilgavimab) to?**

---

49. **Please, specify dose (mg/kg/day)**

---

50. **Did you observe any clinical benefit as a result?**

---

51. **Did you report any side effect in relation to the drug being administered?**

---

52. **Please state if the choice of monoclonal antibody was determined by**

*Contrassegna solo un ovale.*

the SARS-CoV-2 circulating variant at that moment

the available molecule at the Hospital

Altro: \_\_\_\_\_

### **MIS-C management and treatment**

53. **Did you use steroids for the clinical management of MIS-C? \***

*Contrassegna solo un ovale.*

yes

no

Altro: \_\_\_\_\_

54. **How many patients were treated with steroids for MIS-C?**

---

55. **How old was the youngest patient you prescribed steroids to?**

---

56. **Please, specify drug name and dose (mg/kg/day)**

---

57. **Did you observe any clinical benefit as a result?**

---

58. **Did you report any side effect in relation to the drug being administered?**

---

59. **Did you use Immunoglobulins (IVIGs) for the clinical management of MIS-C? \***

*Contrassegna solo un ovale.*

yes

no

Altro: \_\_\_\_\_

60. **How many patients were treated with IVIGs for MIS-C?**

---

61. **How old was the youngest patient you prescribed IVIGs to?**

---

62. **Please, specify drug name and dose (mg/kg/day)**

---

63. **Did you observe any clinical benefit as a result?**

---

64. **Did you report any side effect in relation to the drug being administered?**

---

65. **Please, specify if**

*Contrassegna solo un ovale.*

- both steroids AND IVIGs were always administered
- IVIGs and steroids were administered in a stepwise process (first IVIGs, then steroids)
- Altro: \_\_\_\_\_

66. **Did you use ASA for the clinical management of MIS-C? \***

*Contrassegna solo un ovale.*

- yes
- no
- Altro: \_\_\_\_\_

67. **How many patients were treated with ASA for MIS-C?**

---

68. **How old was the youngest patient you prescribed ASA to?**

---

69. **Please, specify dose (mg/kg/day)**

---

70. **Did you observe any clinical benefit as a result?**

---

71. **Did you report any side effect in relation to the drug being administered?**

---

72. **Did you use Anakinra for the clinical management of MIS-C? \***

*Contrassegna solo un ovale.*

yes

no

Altro: \_\_\_\_\_

73. **How many patients were treated with Anakinra for MIS-C?**

---

74. **How old was the youngest patient you prescribed Anakinra to?**

---

75. **Please, specify dose (mg/kg/day)**

---

76. **Did you observe any clinical benefit as a result?**

---

77. **Did you report any side effect in relation to the drug being administered?**

---

78. **Did you use ACE-i for the clinical management of MIS-C?** \*

*Contrassegna solo un ovale.*

yes

no

Altro: \_\_\_\_\_

79. **How many patients were treated with ACE-i for MIS-C?**

\_\_\_\_\_

80. **How old was the youngest patient you prescribed ACE-i to?**

\_\_\_\_\_

81. **Please, specify drug name and dose (mg/kg/day)**

\_\_\_\_\_

82. **Did you observe any clinical benefit as a result?**

\_\_\_\_\_

83. **Did you report any side effect in relation to the drug being administered?**

\_\_\_\_\_

**Off-label use in Covid-19 and/or MIS-C treatment**



84. **How many and which molecules did you use off-label in children, for treatment of Covid-19 and/or MIS-C?**

---

---

---

---

---

**Comments**

85. **Please, add any comments**

---

---

---

---

---

---

Questi contenuti non sono creati né avallati da Google.

Google Moduli
